# Supplementary material
Source: HighWire-hosted journal article supplement (https://srh.bmj.com/content/bmjsrh-2020-200623)
Supplement: inline-supplementary-material-1 [file inline-supplementary-material-1.pdf]

**Supplemental Table 1. Survey Domains.**

| Supplemental Table 1. Survey Domains. |                                                                                                    |
|---------------------------------------|----------------------------------------------------------------------------------------------------|
| Survey Domains                        | Sample Questions                                                                                   |
| HIV Risk                              | Sexual partners; STI history; injection drug use                                                   |
| Knowledge                             | HIV risk factors; PrEP (efficacy, side effects); how to obtain PrEP                                |
| Attitudes                             | Stigma; interest; personal HIV risk perception                                                     |
| Preferences                           | Preferred locations for counseling and provision of PrEP; trusted information sources for HIV/PrEP |
| Sociodemographics                     | Age; ethnicity; education; place of usual medical care; previous HIV testing                       |
