# Supplementary material
Source: HighWire-hosted journal article supplement (https://srh.bmj.com/content/bmjsrh-2020-200623)
Supplement: inline-supplementary-material-3 [file inline-supplementary-material-3.pdf]

**Supplemental Table 3. Self-Assessment of HIV Risk and Worry of HIV Infection by Candidacy for PrEP.**

| Supplemental Table 2. Self-Assessment of HIV Risk and Worry of HIV Infection by Candidacy for PrEP. |                          |                          |         |
|-----------------------------------------------------------------------------------------------------|--------------------------|--------------------------|---------|
|                                                                                                     | PrEP Candidate<br>(n=64) | Non-Candidate<br>(n=129) |         |
| <i>HIV Attitudes</i>                                                                                | Median (IQR)             | median (IQR)             | p-value |
| "I think my chances of getting infected with HIV are:"*                                             | 3 (1-3)                  | 1 (1-2)                  | <0.01   |
| "I worry about getting infected with HIV:"**                                                        | 2 (1-3)                  | 1 (1-2)                  | <0.01   |

\*response is scale of 1-6, where 1=Zero, 2=Almost zero, 3=Small, 4=Moderate, 5=Large, 6=Very large

\*\*response is scale of 1-6, where 1=None of the time, 2=Rarely, 3=Some of the time, 4=A moderate amount of time, 5=A lot of the time, 6=All of the time
